# Supplementary material for: CRISPR and Compound Screens in a Novel Ex Vivo Tissue Model Identify DDR1 and ETA as Regulators of Cancer Cell Invasion
Source: Research Square preprint supplement (doi:10.21203/rs.3.rs-8250186/v1), 2026-01-20

Fig. 3A

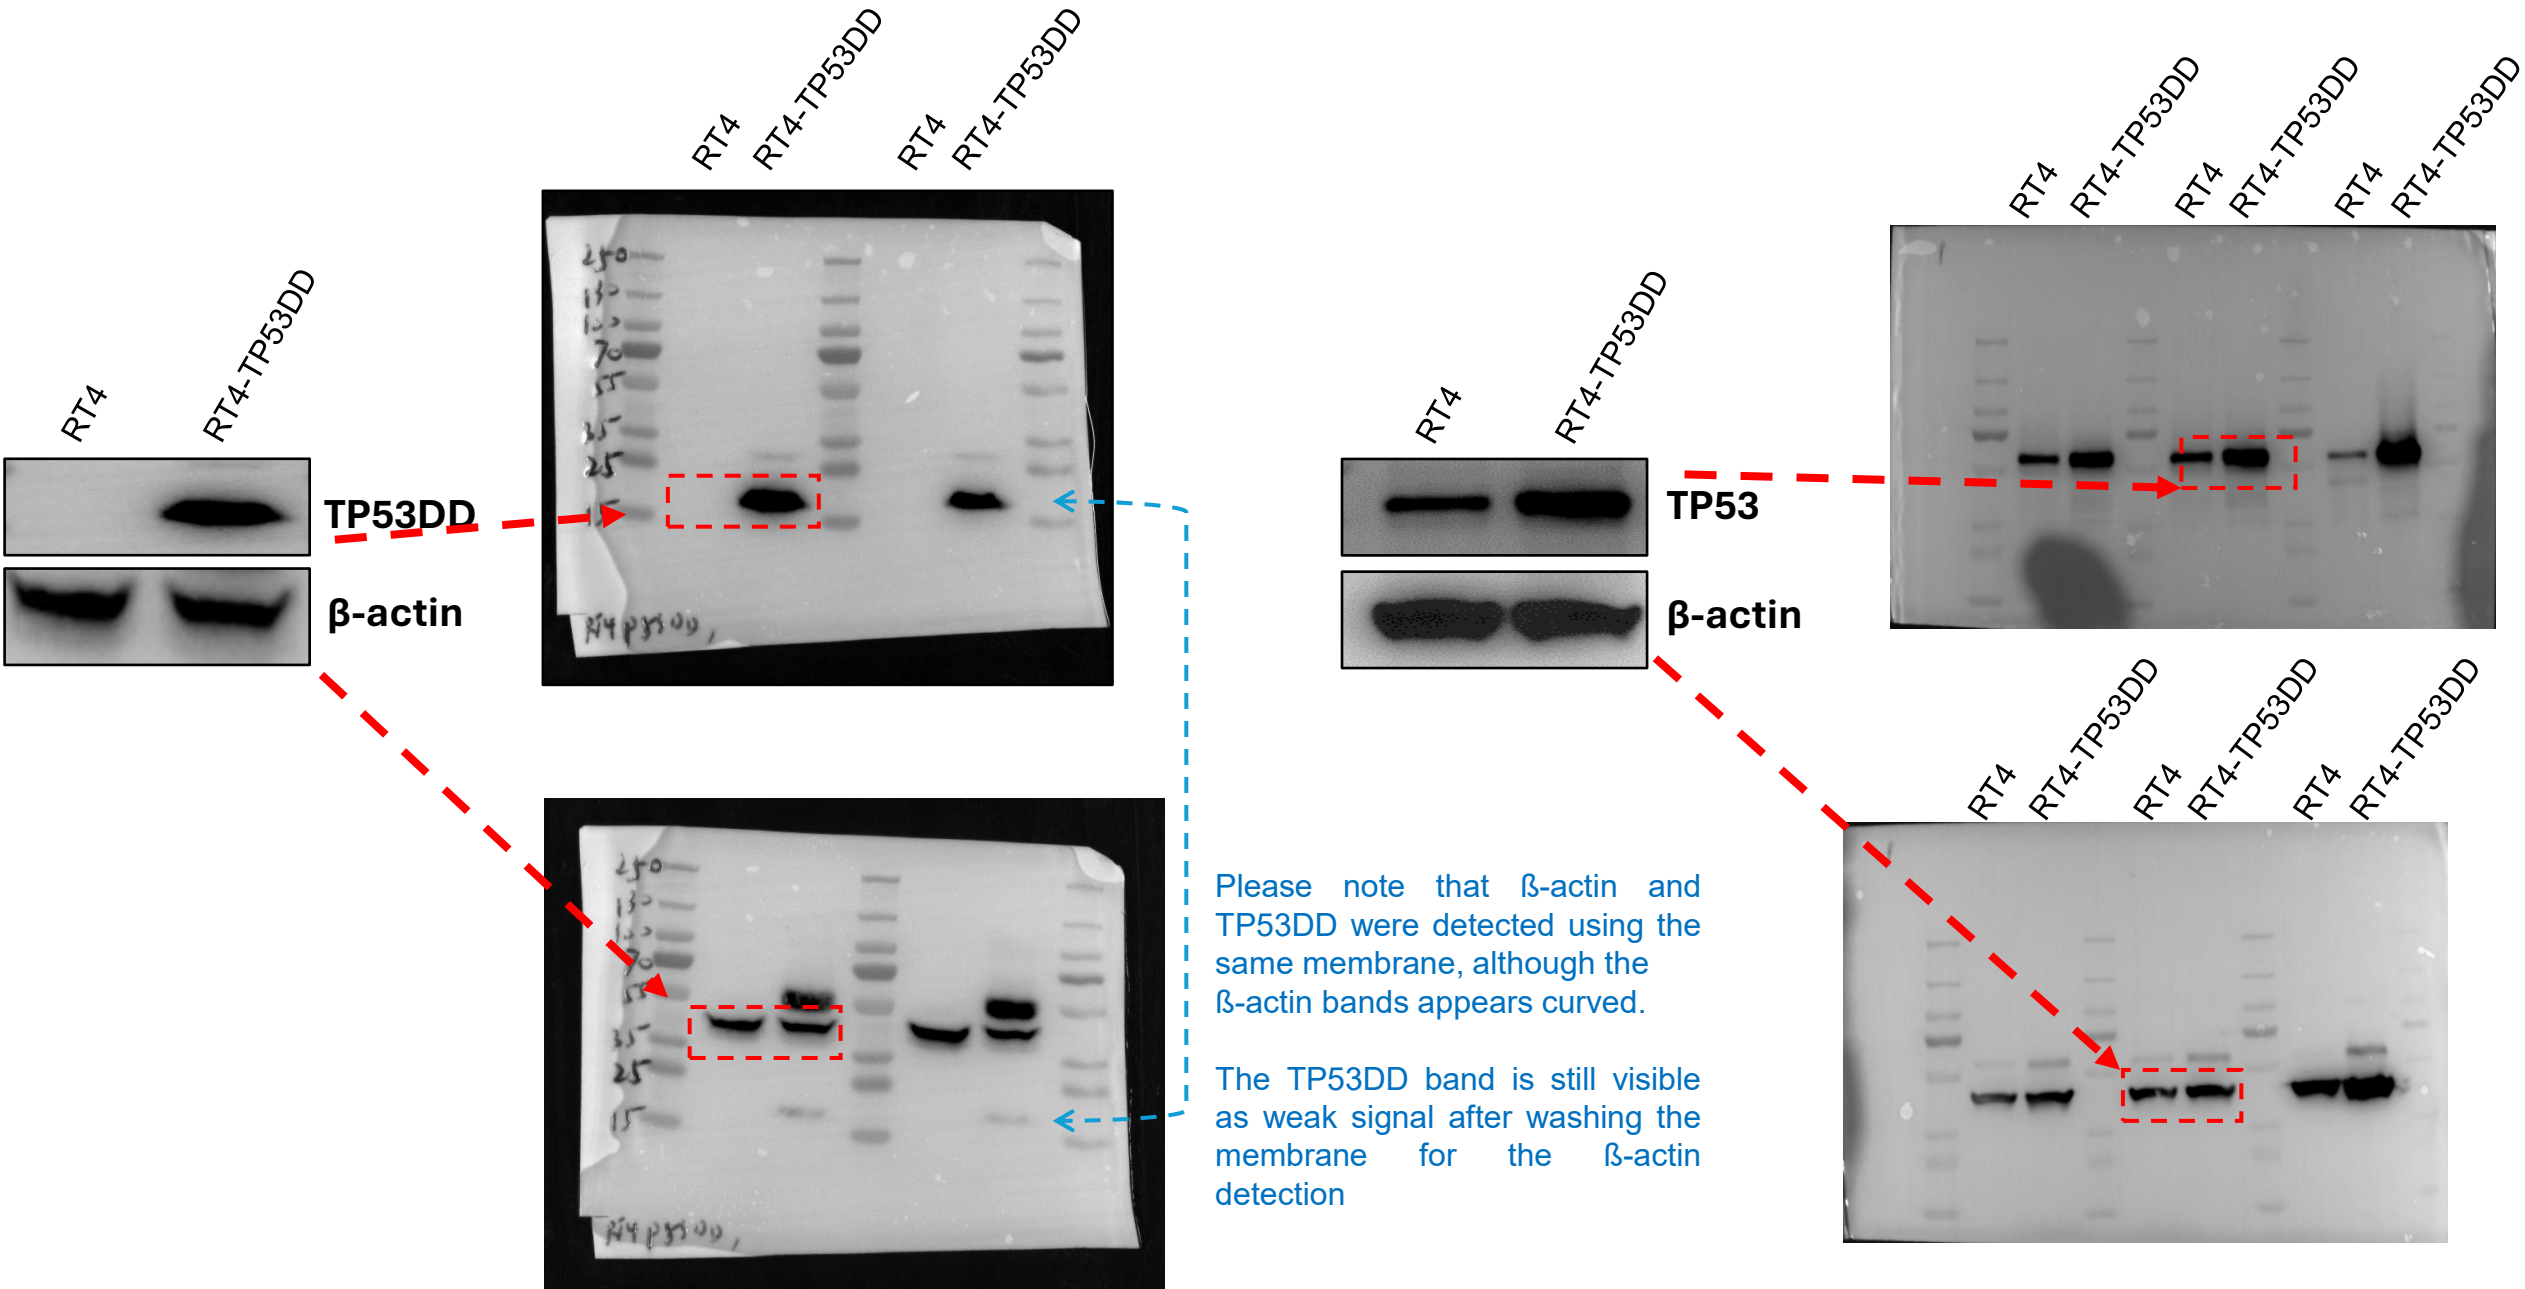

**Fig. 5D**

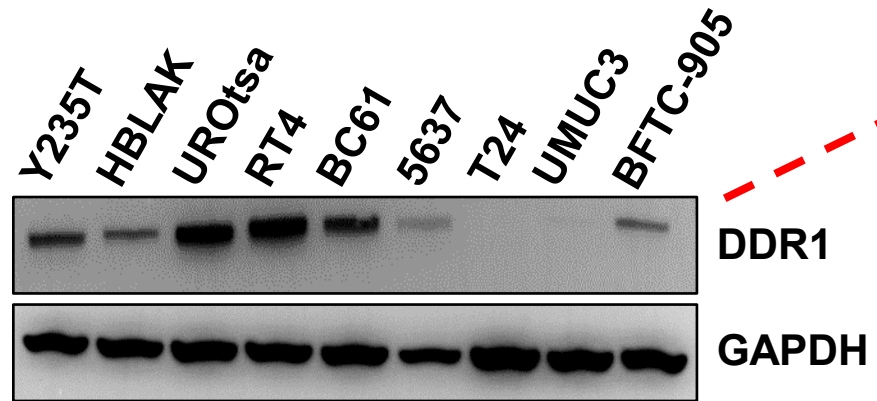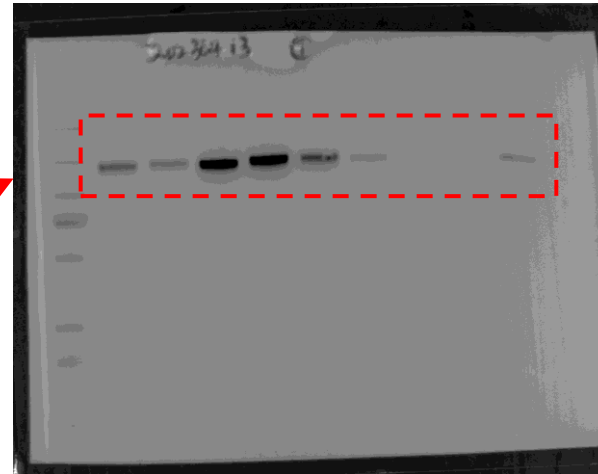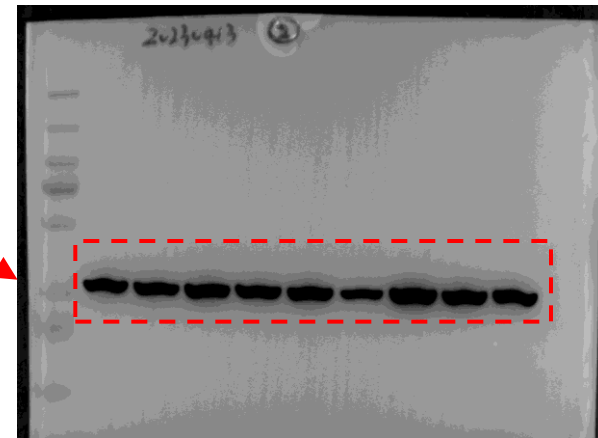

**Fig. 6**

**A**

RT4-TP53DD-gGFP#1  
RT4-TP53DD-gGFP#2  
RT4-TP53DD-gDDR1#1  
RT4-TP53DD-gDDR1#2

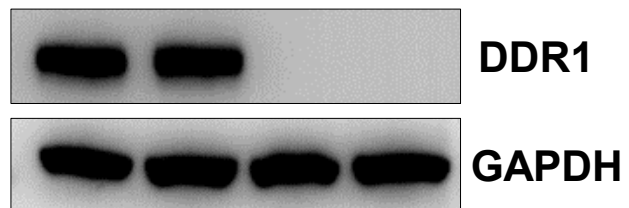

DDR1

GAPDH

**B**

T24-EV  
T24-DDR1

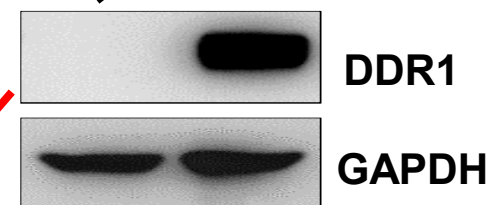

DDR1

GAPDH

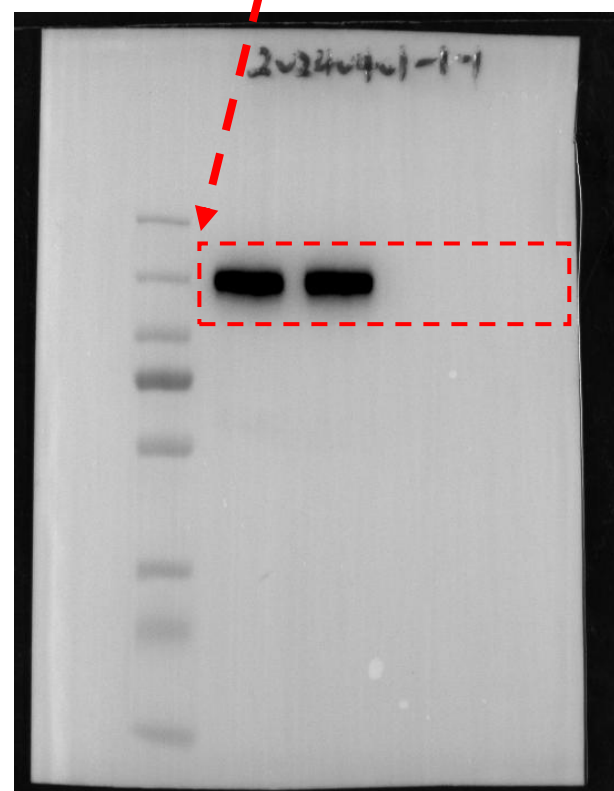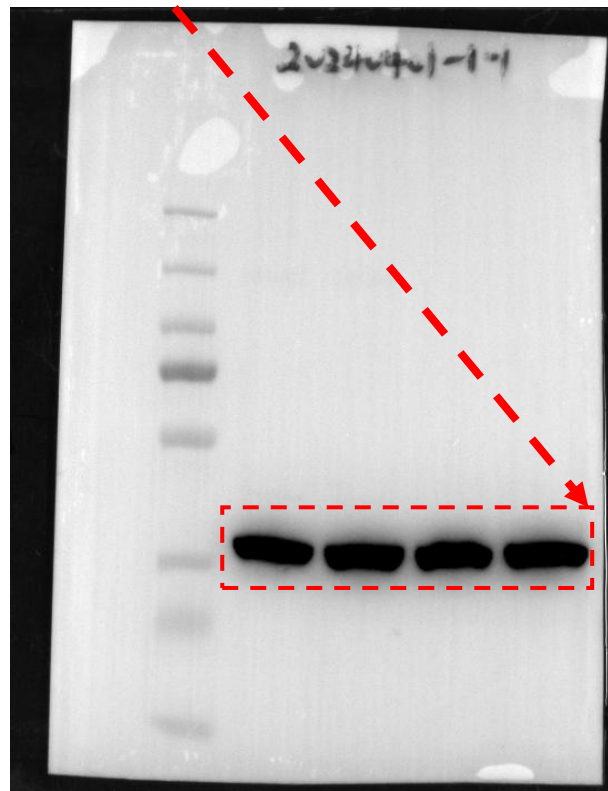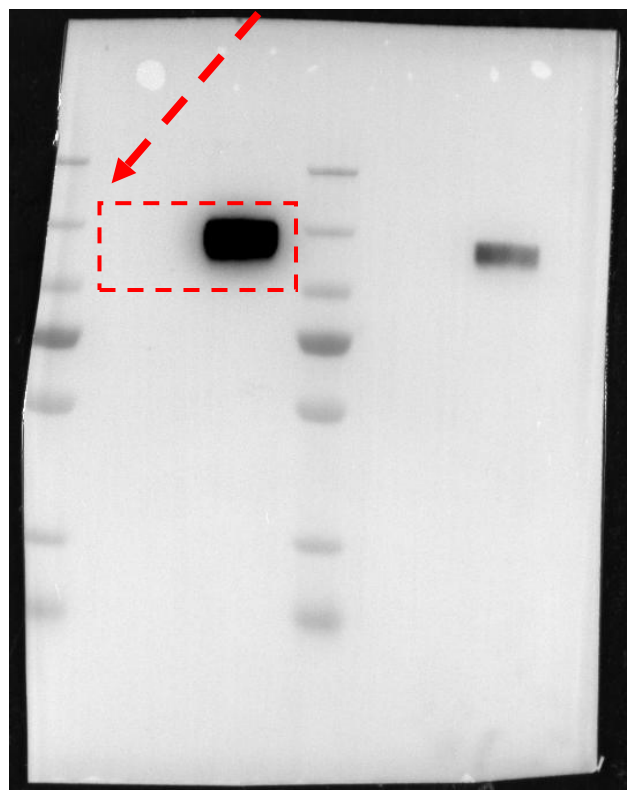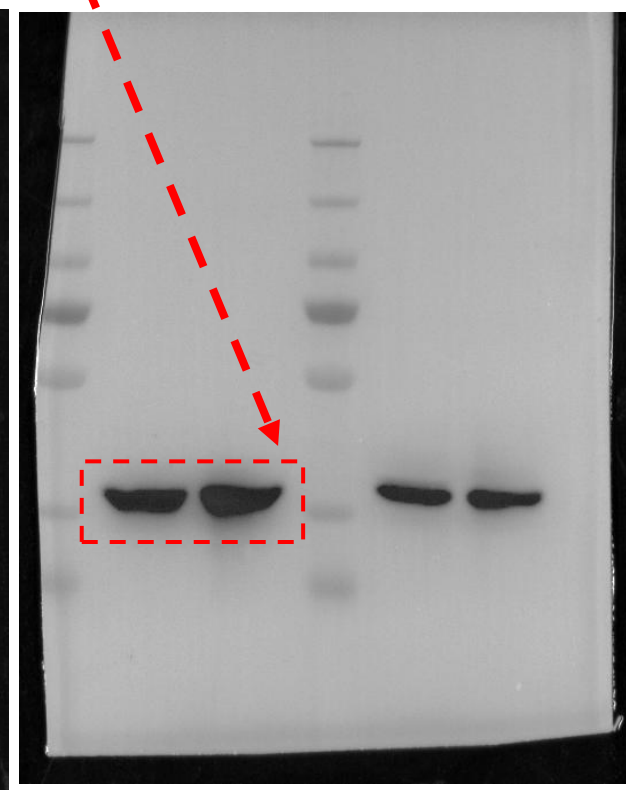

SF2

A

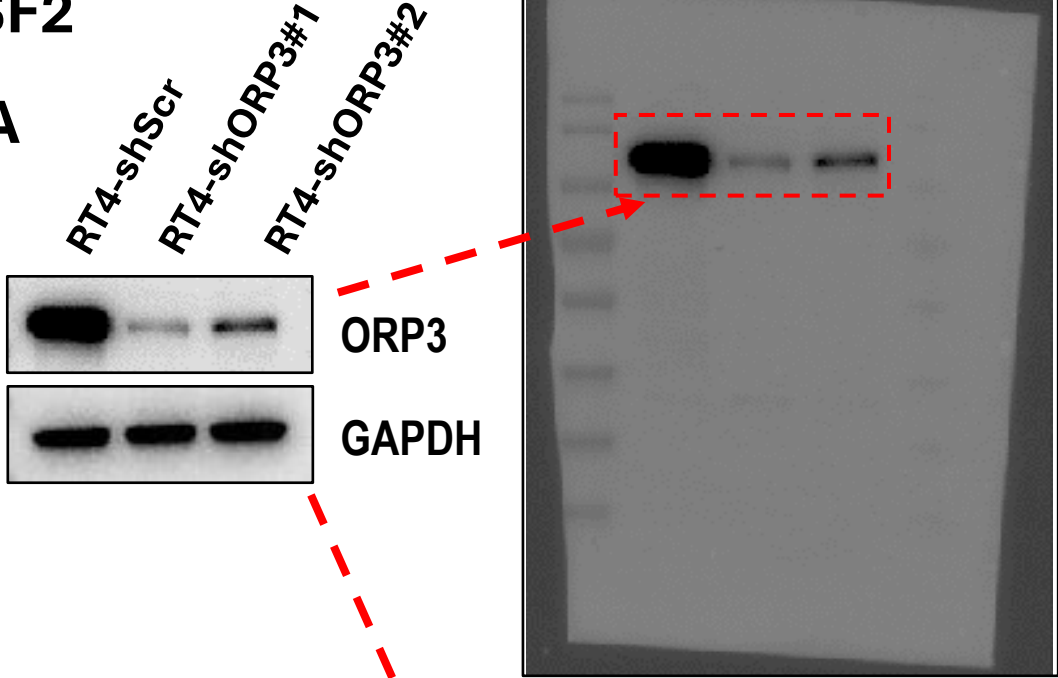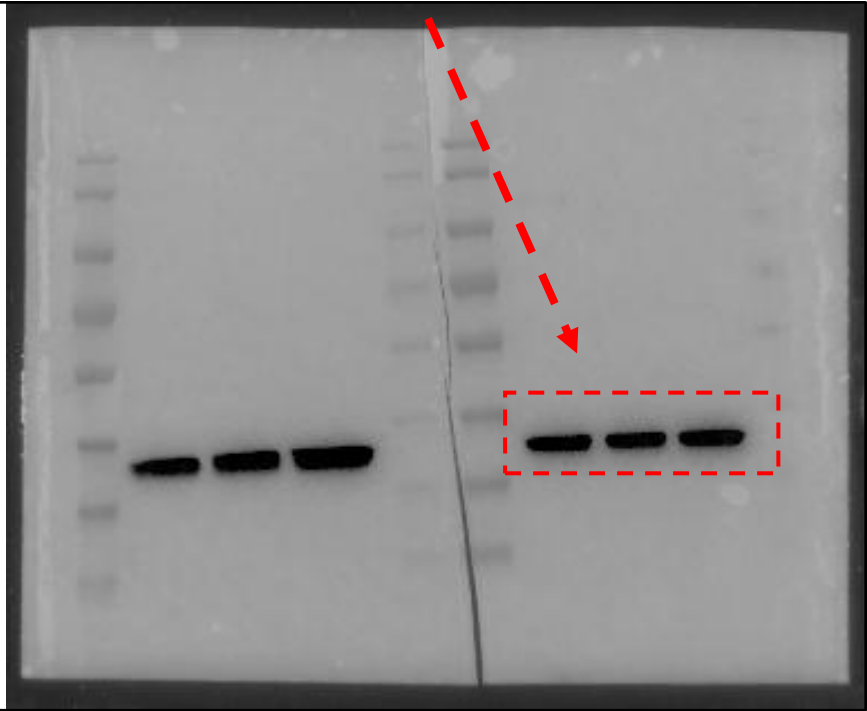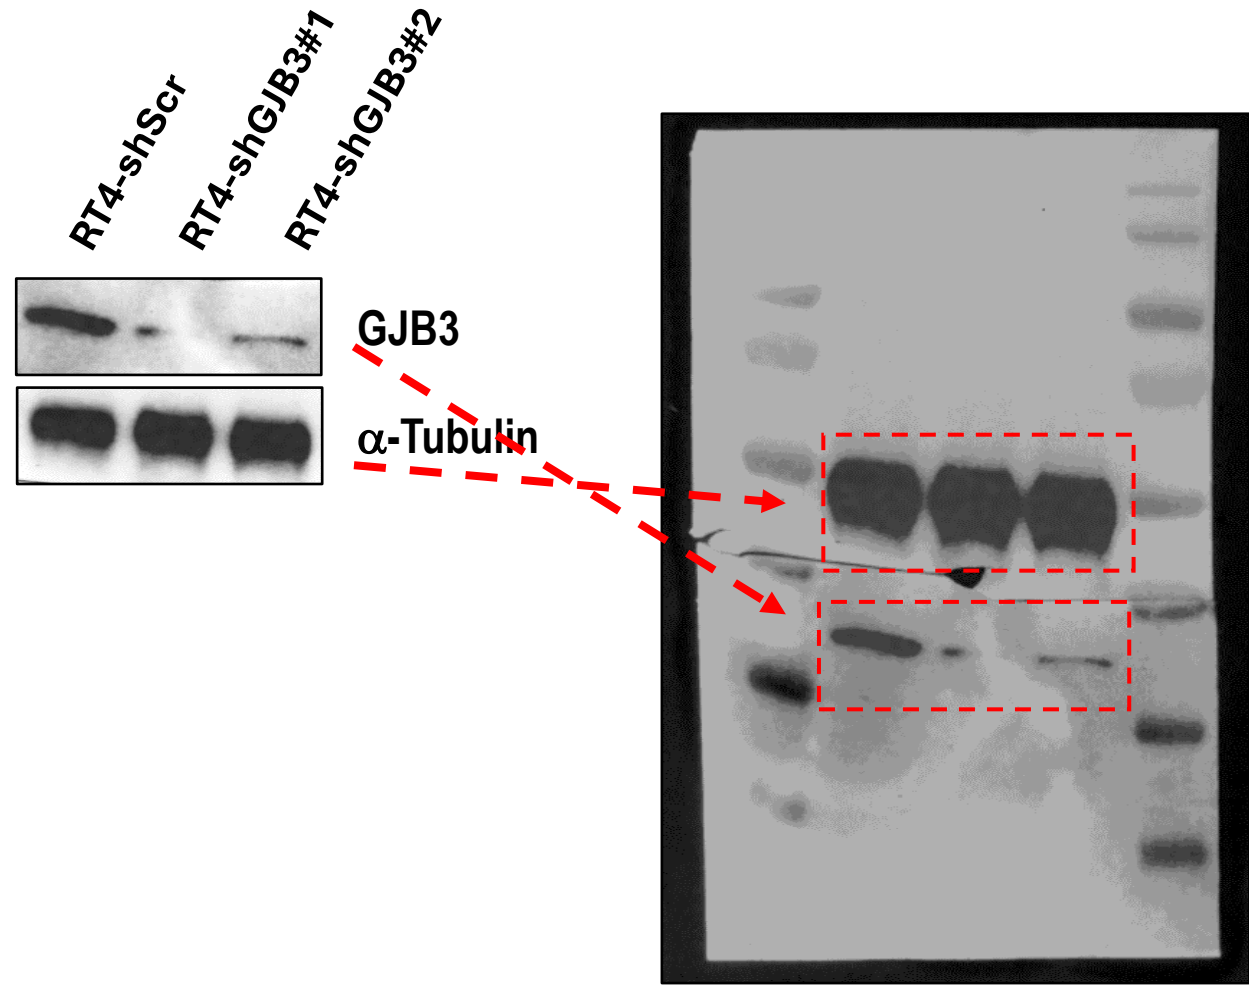

SF2

B

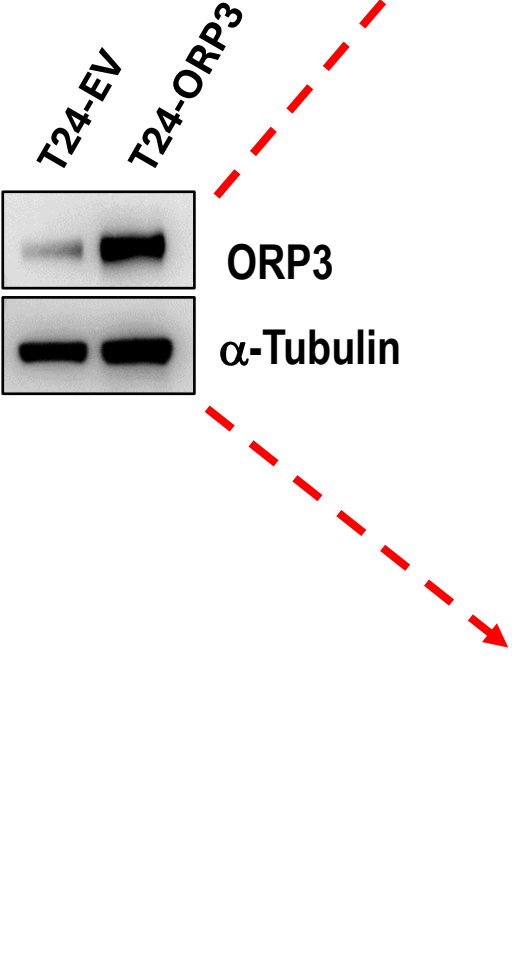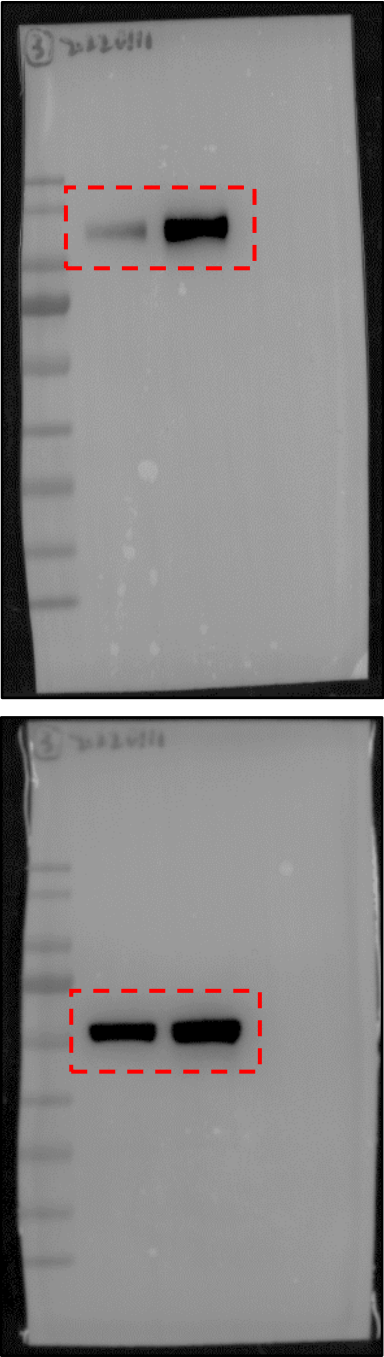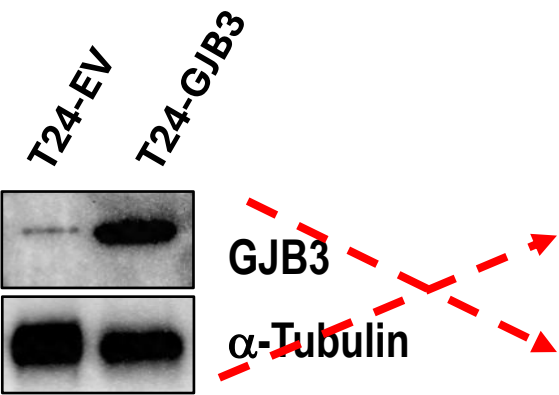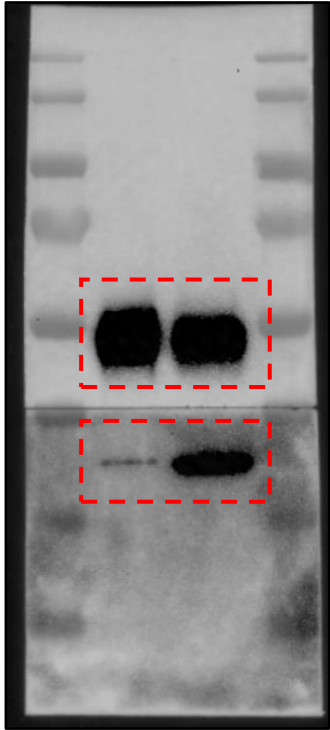



SF3

A

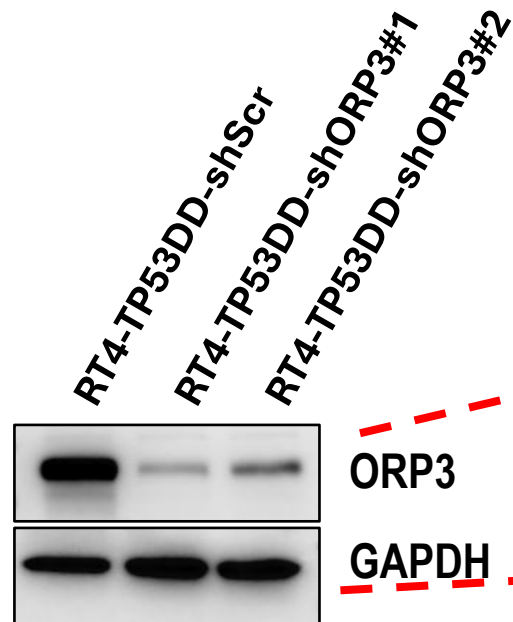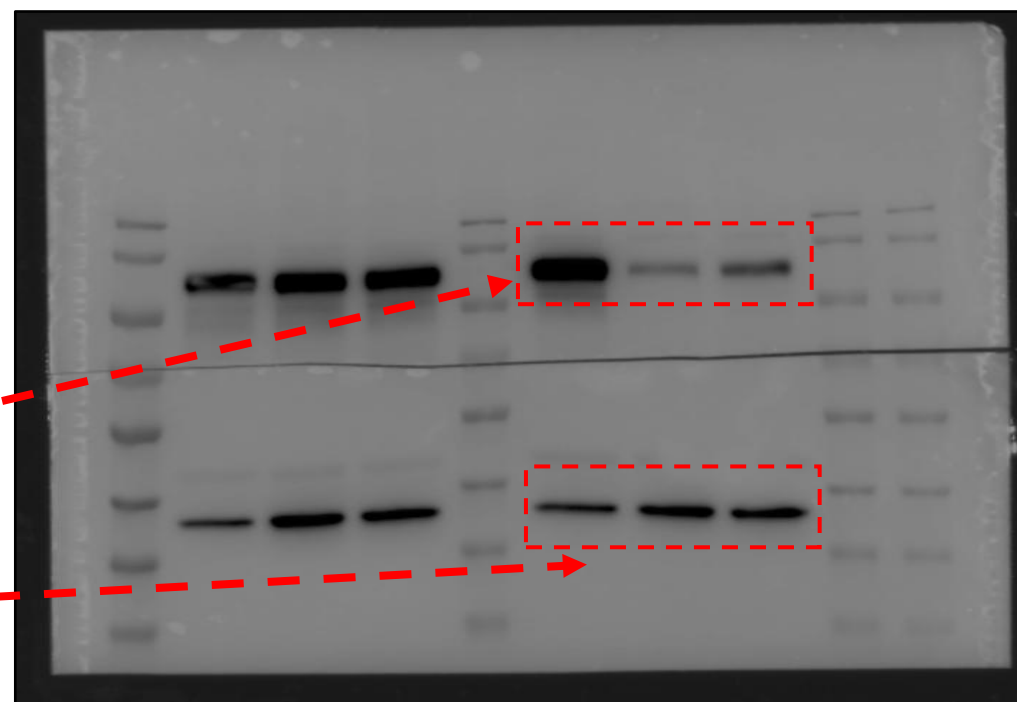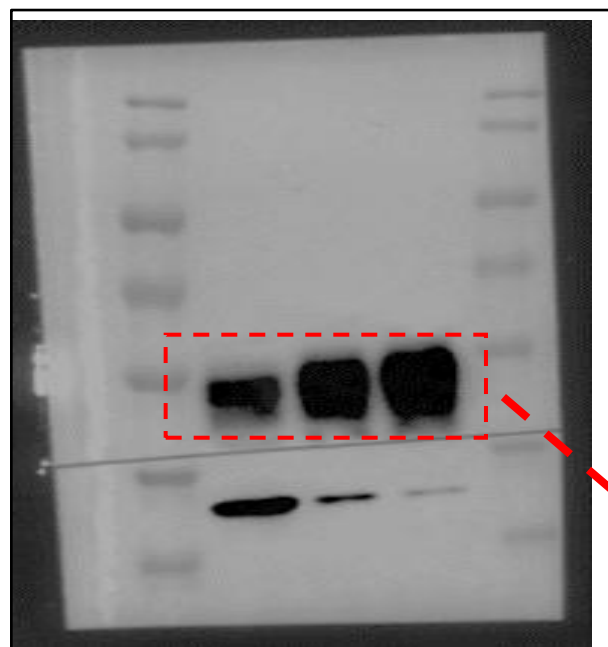

B

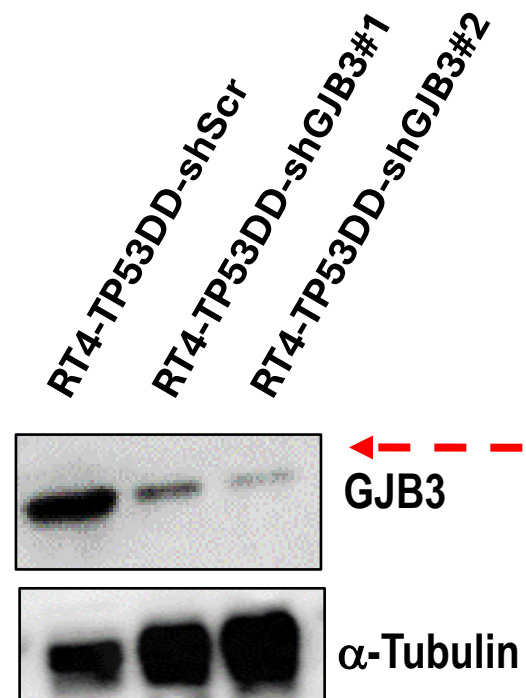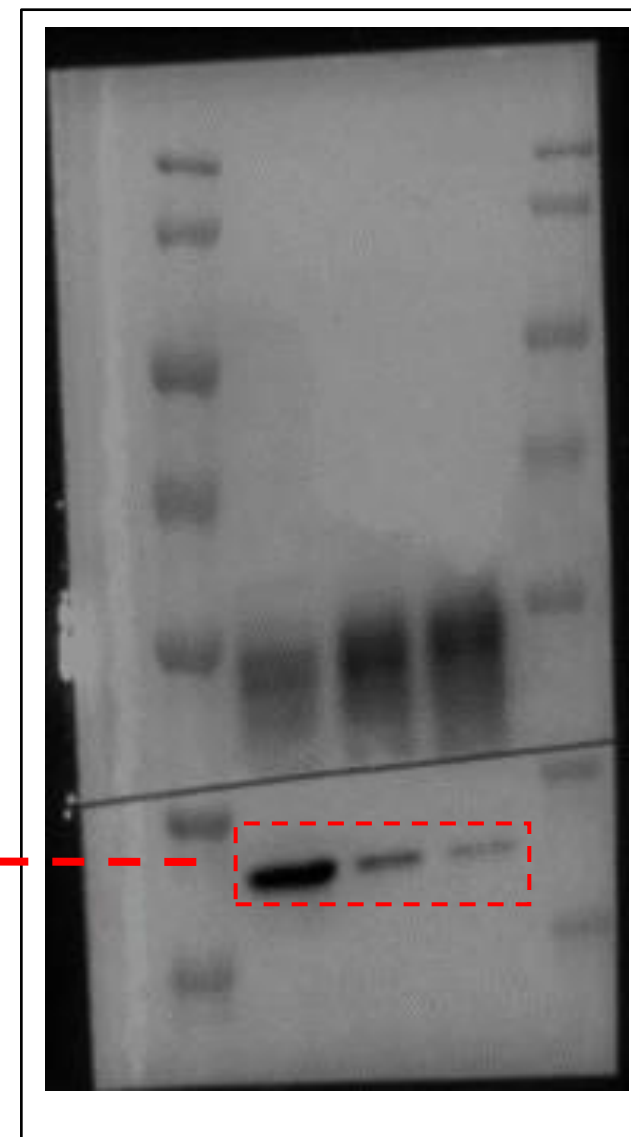

Supplement: Supplementary file 1 [file 0416bfa2735c185f18d1e9ed.pdf]
